# Supplementary material
Source: PubMed Central journal article supplement (PMC8594164)
Supplement: 13063_2021_5743_MOESM2_ESM.pdf [file 13063_2021_5743_MOESM2_ESM.pdf]

Date: \_\_/\_\_/\_\_

# Patient Survey (QoR – 40)

Name: \_\_\_\_\_ study #: \_\_\_\_\_ Hospital UR #: \_\_\_\_\_

## PART A

**How have you been feeling in the last 24 hours?**

(1 to 5, where : 1 = very poor and 5 = excellent)

**For example:** If you have been able to breathe easily all of the time, you should indicate this by circling the response 5 = *all of the time* as shown below:

|                        | None of the time | Some of the time | Usually | Most of the time | All of the time |
|------------------------|------------------|------------------|---------|------------------|-----------------|
| Able to breathe easily | 1                | 2                | 3       | 4                | 5               |

|                                        | None of the time | Some of the time | Usually | Most of the time | All of the time |
|----------------------------------------|------------------|------------------|---------|------------------|-----------------|
| <b>Comfort</b>                         |                  |                  |         |                  |                 |
| Able to breathe easily                 | 1                | 2                | 3       | 4                | 5               |
| Have had a good sleep                  | 1                | 2                | 3       | 4                | 5               |
| Been able to enjoy food                | 1                | 2                | 3       | 4                | 5               |
| Feel rested                            | 1                | 2                | 3       | 4                | 5               |
| <b>Emotions</b>                        |                  |                  |         |                  |                 |
| Having a feeling of general well-being | 1                | 2                | 3       | 4                | 5               |
| Feeling in control                     | 1                | 2                | 3       | 4                | 5               |
| Feeling comfortable                    | 1                | 2                | 3       | 4                | 5               |

## ***How have you been feeling in the last 24 hours?***

**(1 to 5, where : 1 = very poor and 5 = excellent)**

|                                                                  | <b>None of<br/>the time</b> | <b>Some of<br/>the time</b> | <b>Usually</b> | <b>Most of<br/>the time</b> | <b>All of<br/>the time</b> |
|------------------------------------------------------------------|-----------------------------|-----------------------------|----------------|-----------------------------|----------------------------|
| <b>Physical Independence</b>                                     |                             |                             |                |                             |                            |
| Have normal speech                                               | 1                           | 2                           | 3              | 4                           | 5                          |
| Able to wash, brush teeth<br>or shave                            | 1                           | 2                           | 3              | 4                           | 5                          |
| Able to look after your<br>own appearance                        | 1                           | 2                           | 3              | 4                           | 5                          |
| Able to write                                                    | 1                           | 2                           | 3              | 4                           | 5                          |
| Able to return to work<br>or usual home activities               | 1                           | 2                           | 3              | 4                           | 5                          |
| <br>                                                             |                             |                             |                |                             |                            |
| <b>Patient Support</b>                                           |                             |                             |                |                             |                            |
| Able to communicate<br>with hospital staff<br>(when in hospital) | 1                           | 2                           | 3              | 4                           | 5                          |
| Able to communicate<br>with family or friends                    | 1                           | 2                           | 3              | 4                           | 5                          |
| Getting support from<br>hospital doctors<br>(when in hospital)   | 1                           | 2                           | 3              | 4                           | 5                          |
| Getting support from<br>hospital nurses<br>(when in hospital)    | 1                           | 2                           | 3              | 4                           | 5                          |
| Having support from<br>family or friends                         | 1                           | 2                           | 3              | 4                           | 5                          |
| Able to understand<br>instructions and advice                    | 1                           | 2                           | 3              | 4                           | 5                          |

## PART B

***Have you had any of the following in the last 24 hours?***

**(5 to 1, where: 5 = excellent and 1 = very poor)**

|                                  | <b>None of<br/>the time</b> | <b>Some of<br/>the time</b> | <b>Usually</b> | <b>Most of<br/>the time</b> | <b>All of<br/>the time</b> |
|----------------------------------|-----------------------------|-----------------------------|----------------|-----------------------------|----------------------------|
| <b>Comfort</b>                   |                             |                             |                |                             |                            |
| Nausea                           | 5                           | 4                           | 3              | 2                           | 1                          |
| Vomiting                         | 5                           | 4                           | 3              | 2                           | 1                          |
| Dry-retching                     | 5                           | 4                           | 3              | 2                           | 1                          |
| Feeling restless                 | 5                           | 4                           | 3              | 2                           | 1                          |
| Shaking or twitching             | 5                           | 4                           | 3              | 2                           | 1                          |
| Shivering                        | 5                           | 4                           | 3              | 2                           | 1                          |
| Feeling too cold                 | 5                           | 4                           | 3              | 2                           | 1                          |
| Feeling dizzy                    | 5                           | 4                           | 3              | 2                           | 1                          |
| <b>Emotions</b>                  |                             |                             |                |                             |                            |
| Had bad dreams                   | 5                           | 4                           | 3              | 2                           | 1                          |
| Feeling anxious                  | 5                           | 4                           | 3              | 2                           | 1                          |
| Feeling angry                    | 5                           | 4                           | 3              | 2                           | 1                          |
| Feeling depressed                | 5                           | 4                           | 3              | 2                           | 1                          |
| Feeling alone                    | 5                           | 4                           | 3              | 2                           | 1                          |
| Had difficulty<br>falling asleep | 5                           | 4                           | 3              | 2                           | 1                          |

***Have you had any of the following in the last 24 hours?***

**(5 to 1, where: 5 = excellent and 1 = very poor)**

|                        | <b>None of<br/>the time</b> | <b>Some of<br/>the time</b> | <b>Usually</b> | <b>Most of<br/>the time</b> | <b>All of<br/>the time</b> |
|------------------------|-----------------------------|-----------------------------|----------------|-----------------------------|----------------------------|
| <b>Patient Support</b> |                             |                             |                |                             |                            |
| Feeling confused       | 5                           | 4                           | 3              | 2                           | 1                          |
| <b>Pain</b>            |                             |                             |                |                             |                            |
| Moderate pain          | 5                           | 4                           | 3              | 2                           | 1                          |
| Severe pain            | 5                           | 4                           | 3              | 2                           | 1                          |
| Headache               | 5                           | 4                           | 3              | 2                           | 1                          |
| Muscle pains           | 5                           | 4                           | 3              | 2                           | 1                          |
| Backache               | 5                           | 4                           | 3              | 2                           | 1                          |
| Sore throat            | 5                           | 4                           | 3              | 2                           | 1                          |
| Sore mouth             | 5                           | 4                           | 3              | 2                           | 1                          |

Thank you for your assistance.

**Please check that all questions have been answered.**

If you have any questions, please contact: Jenny Hunt or Helen Fletcher through the hospital's switchboard (03) 9276 2000.
