# Supplementary material
Source: PubMed Central journal article supplement (PMC8594164)
Supplement: 13063_2021_5743_MOESM3_ESM.pdf [file 13063_2021_5743_MOESM3_ESM.pdf]

All items from the World Health Organization Trial Registration Data Set (SPIRIT item 2b)

| <b>Data category</b>                          | <b>Information</b>                                                                                                                                                                                                                                                                                                                                                                                                                                                                                         |
|-----------------------------------------------|------------------------------------------------------------------------------------------------------------------------------------------------------------------------------------------------------------------------------------------------------------------------------------------------------------------------------------------------------------------------------------------------------------------------------------------------------------------------------------------------------------|
| Primary registry and trial identifying number | ClinicalTrials.gov<br>NCT04142840                                                                                                                                                                                                                                                                                                                                                                                                                                                                          |
| Date of registration in primary registry      | 26 October 2019                                                                                                                                                                                                                                                                                                                                                                                                                                                                                            |
| Secondary identifying numbers                 | DP-TEA 2.0                                                                                                                                                                                                                                                                                                                                                                                                                                                                                                 |
| Source(s) of monetary or material support     | Youth Program of National Natural Science Foundation of China (No. 81801096, to Song Zhang)                                                                                                                                                                                                                                                                                                                                                                                                                |
| Primary sponsor                               | Renji Hospital                                                                                                                                                                                                                                                                                                                                                                                                                                                                                             |
| Secondary sponsor(s)                          | /                                                                                                                                                                                                                                                                                                                                                                                                                                                                                                          |
| Contact for public queries                    | Weifeng Yu, MD, PhD, 86+13901961704,<br>yuweifeng@renji.com                                                                                                                                                                                                                                                                                                                                                                                                                                                |
| Contact for scientific queries                | Song Zhang, MD, PhD, 86+15150012530,<br>zhangsong@renji.com                                                                                                                                                                                                                                                                                                                                                                                                                                                |
| Public title                                  | Comparing the Effects of Dexmedetomidine versus Propofol on the Treatment of Emergence Agitation in Adult Patients after General Anesthesia                                                                                                                                                                                                                                                                                                                                                                |
| Scientific title                              | Comparing the Effects of Dexmedetomidine versus Propofol on the Treatment of Emergence Agitation in Adult Patients after General Anesthesia: study protocol for a randomized controlled trial (DP-TEA Trial)                                                                                                                                                                                                                                                                                               |
| Countries of recruitment                      | China                                                                                                                                                                                                                                                                                                                                                                                                                                                                                                      |
| Health condition(s) or problem(s) studied     | Emergence agitation after general anesthesia                                                                                                                                                                                                                                                                                                                                                                                                                                                               |
| Intervention(s)                               | <p><b><i>Intervention Name:</i></b> Dexmedetomidine group</p> <p><b><i>Intervention Description:</i></b> Once emergence agitation occurs, the participant assigned to dexmedetomidine group will be infused with a single dose of 0.7ug/kg dexmedetomidine.</p> <p><b><i>Intervention Name:</i></b> Propofol group</p> <p><b><i>Intervention Description:</i></b> Once emergence agitation occurs, the participant assigned to propofol group will be infused with a single dose of 0.5mg/kg propofol.</p> |

| Data category                        | Information                                                                                                                                                                                                                                                                                                                                                                                                                                                                                                                                                                                                                                                                                                                                                                                                                                                                                                                                                                                                                                                                                                                                                                                                                                                                                                                                              |
|--------------------------------------|----------------------------------------------------------------------------------------------------------------------------------------------------------------------------------------------------------------------------------------------------------------------------------------------------------------------------------------------------------------------------------------------------------------------------------------------------------------------------------------------------------------------------------------------------------------------------------------------------------------------------------------------------------------------------------------------------------------------------------------------------------------------------------------------------------------------------------------------------------------------------------------------------------------------------------------------------------------------------------------------------------------------------------------------------------------------------------------------------------------------------------------------------------------------------------------------------------------------------------------------------------------------------------------------------------------------------------------------------------|
| Key inclusion and exclusion criteria | <p><b>Inclusion criteria:</b></p> <ul style="list-style-type: none"> <li>• adult patients aged 18-65 years of both genders, with American Society of Anesthesiologists (ASA) classification I or II developing EA after general anesthesia with verbal consent.</li> </ul> <p><b>Exclusion Criteria:</b></p> <ul style="list-style-type: none"> <li>• age younger than 18 years or older than 65 years;</li> <li>• ASA classification <math>\geq</math>III;</li> <li>• preoperative lung dysfunction (including pneumonia, atelectasis, acute respiratory distress syndrome, acute lung injury, and so on);</li> <li>• preoperative heart dysfunction (including severe cardiac coronary disease, unstable angina, left ventricular ejection fraction <math>\leq</math>30%, sick sinus syndrome, bradycardia: heart rate (HR) <math>\leq</math>50beats/min, the second or third degree of atrioventricular block);</li> <li>• history of mental disease;</li> <li>• uncontrolled hypertension (baseline: systolic blood pressure (SBP) <math>\geq</math>160mmHg or diastolic blood pressure (DBP) <math>\geq</math>110mmHg);</li> <li>• enrolled in other researches within 90 days;</li> <li>• allergic to dexmedetomidine or propofol;</li> <li>• 10) body mass index (BMI) less than 18 kg/m<sup>2</sup> or more than 30 kg/m<sup>2</sup>.</li> </ul> |
| Study type                           | <p>Interventional<br/> <b>Allocation:</b> randomized<br/> <b>Intervention model:</b> parallel<br/> <b>Masking:</b> Blind to patients, outcome assessors, care providers, data collectors and statisticians.<br/> <b>Primary purpose:</b> recovery quality after general anesthesia research</p>                                                                                                                                                                                                                                                                                                                                                                                                                                                                                                                                                                                                                                                                                                                                                                                                                                                                                                                                                                                                                                                          |
| Date of first enrolment              | 1 November 2019                                                                                                                                                                                                                                                                                                                                                                                                                                                                                                                                                                                                                                                                                                                                                                                                                                                                                                                                                                                                                                                                                                                                                                                                                                                                                                                                          |
| Target sample size                   | 120                                                                                                                                                                                                                                                                                                                                                                                                                                                                                                                                                                                                                                                                                                                                                                                                                                                                                                                                                                                                                                                                                                                                                                                                                                                                                                                                                      |
| Recruitment status                   | Enrolling                                                                                                                                                                                                                                                                                                                                                                                                                                                                                                                                                                                                                                                                                                                                                                                                                                                                                                                                                                                                                                                                                                                                                                                                                                                                                                                                                |
| Primary outcome(s)                   | The primary outcome is the proportion of patients having a recurrent EA within 15min after intervention in the PACU. EA is defined as a restless state with a Riker's Sedation-Agitation Scale (RSAS) score of 5 or more                                                                                                                                                                                                                                                                                                                                                                                                                                                                                                                                                                                                                                                                                                                                                                                                                                                                                                                                                                                                                                                                                                                                 |

|                        |                                                                                                                                                                                                                                                                                                                                                                                                                                                                                                                                                                                                                                                                                                                                                                                                                                                                                                                                                                                                                                                                                                                                                                                                     |
|------------------------|-----------------------------------------------------------------------------------------------------------------------------------------------------------------------------------------------------------------------------------------------------------------------------------------------------------------------------------------------------------------------------------------------------------------------------------------------------------------------------------------------------------------------------------------------------------------------------------------------------------------------------------------------------------------------------------------------------------------------------------------------------------------------------------------------------------------------------------------------------------------------------------------------------------------------------------------------------------------------------------------------------------------------------------------------------------------------------------------------------------------------------------------------------------------------------------------------------|
| Key secondary outcomes | <ul style="list-style-type: none"> <li>• RSAS scores when first EA occurs and at t<sub>2</sub>;</li> <li>• Vital signs at t<sub>0</sub>, t<sub>1</sub>, t<sub>2</sub>, t<sub>3</sub>, including HR, MBP and SpO<sub>2</sub>;</li> <li>• Proportion of patients requiring rescue sufentanil during resuscitation in the PACU: an 11-point numerical rating scale (NRS) is used to assess postoperative pain whenever patients ask for pain medication. If a NRS score is ≥5, additional 5-10µg sufentanil will be injected as rescue medication.</li> <li>• Proportion of patients with PONV, evaluated by a four-point PONV Scale during resuscitation in the PACU;</li> <li>• Time to discharge from the PACU;</li> <li>• Proportion of patients with adverse events after intervention in the PACU, including oxygen desaturation (defined as SpO<sub>2</sub>&lt;90%, regarded as severe desaturation when SpO<sub>2</sub>&lt;85%), severe bradycardia (defined as HR&lt;50 beats/min), shivering, dizziness, laryngospasm, severe coughing, and reintubation;</li> <li>• Recovering quality score assessed at 24 hours after surgery using 40-item quality of recovery scale (QoR-40)</li> </ul> |
| Ethics Review          | <ul style="list-style-type: none"> <li>• Status: Approved</li> <li>• Date of approval: 14th, October 2020</li> <li>• Name and contact details of Ethics committee(s): the Ethics committee of Renji Hospital affiliated to Shanghai Jiao Tong University School of Medicine</li> </ul>                                                                                                                                                                                                                                                                                                                                                                                                                                                                                                                                                                                                                                                                                                                                                                                                                                                                                                              |
| Completion date        | <ul style="list-style-type: none"> <li>• We expect to complete the study on December 31, 2021.</li> </ul>                                                                                                                                                                                                                                                                                                                                                                                                                                                                                                                                                                                                                                                                                                                                                                                                                                                                                                                                                                                                                                                                                           |
| Summary Results        | <ul style="list-style-type: none"> <li>• /</li> </ul>                                                                                                                                                                                                                                                                                                                                                                                                                                                                                                                                                                                                                                                                                                                                                                                                                                                                                                                                                                                                                                                                                                                                               |
| IPD sharing statement  | <ul style="list-style-type: none"> <li>• The data that support the findings of this study will be available from the corresponding author upon reasonable request.</li> </ul>                                                                                                                                                                                                                                                                                                                                                                                                                                                                                                                                                                                                                                                                                                                                                                                                                                                                                                                                                                                                                       |
